# Supplementary material
Source: PubMed Central journal article supplement (PMC2649396)
Supplement: pp.108.131573_1.pdf [file pp.108.131573_1.pdf]

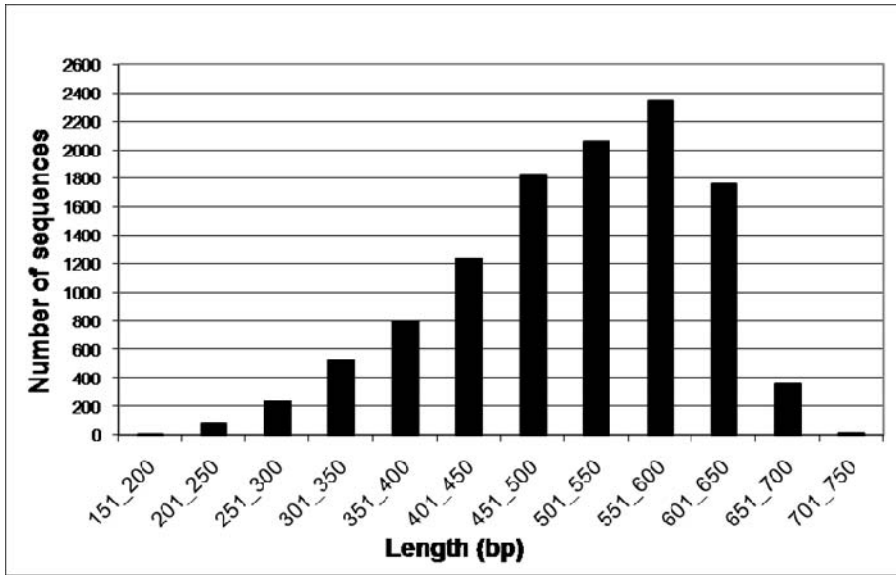

**Supplemental Figure S1:** Distribution of sequence length (bp) of the individual reads that constitute the TOBEST database. These reads were assembled by the CAP3 software into overlapping clusters (contigs) and singlets.
