# Supplementary material
Source: PubMed Central journal article supplement (PMC2649396)
Supplement: pp.108.131573_3.pdf [file pp.108.131573_3.pdf]

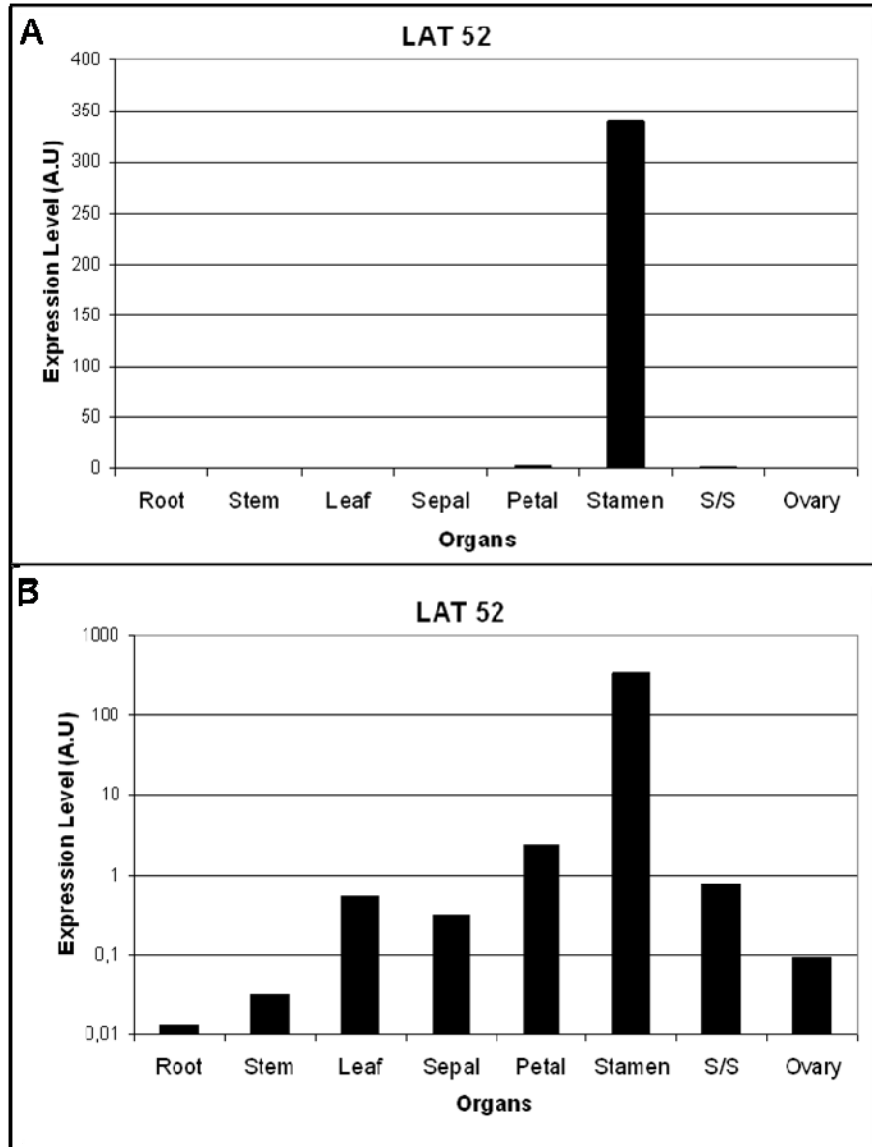

**Supplemental Figure S3:** Expression of the tobacco LAT52 homolog in the different vegetative and floral organs evaluated by real time RT-PCR. In **(A)** the expression level is shown in a linear scale and in **(B)** in a logarithmic scale. As previously described for the tomato LAT52 gene (Twell et al., 1989), the tobacco LAT52 homolog is highly expressed in stamens and at much lower level in petals. However, it is also expressed in stigma/style and other organs, as shown in panel (B). The relative expression levels are represented in arbitrary units (A.U.) normalized to the expression level of the  $\beta$ -actin gene, used as reference, in each RNA organ sample. S/S, Stigma/Style.
