# Supplementary material
Source: PubMed Central journal article supplement (PMC2649396)
Supplement: pp.108.131573_4.pdf [file pp.108.131573_4.pdf]

A

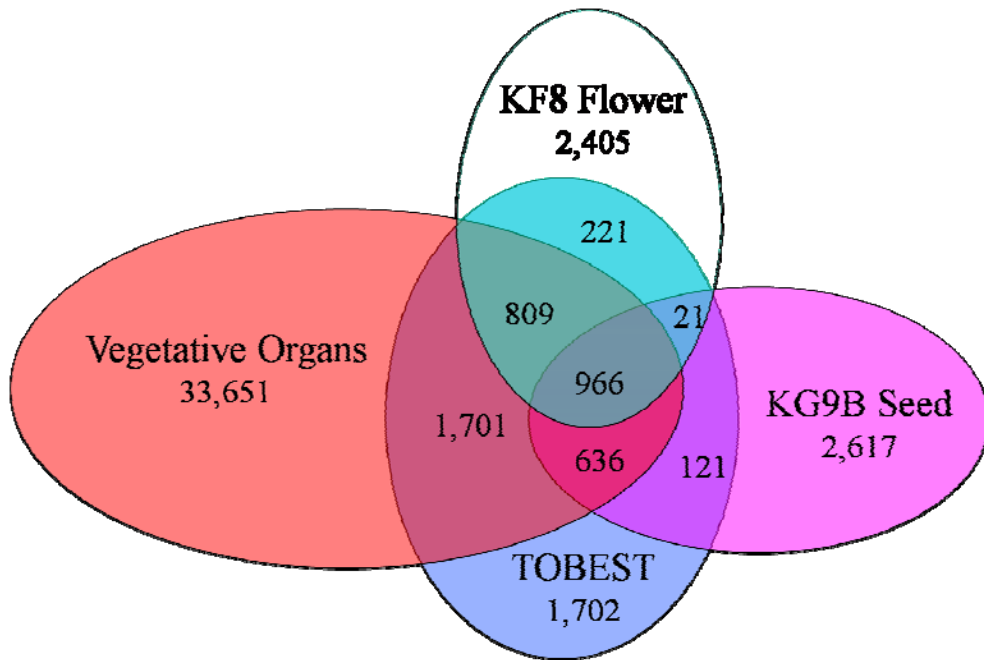

**Total number of ESTs in each of the cDNA libraries:**

**ESTobacco**

- KF8B (Flower) – 1,258
- KF8C (Flower) – 3,164
- KL4B (Leaf Lamina) – 4,540
- KL5B (Leaf Lamina) – 3,755
- TL13 (Leaf Lamina) – 3,205
- BL12 (Leaf Lamina) – 1,938
- KN6B (Leaf Midrib) – 5,150
- KT7B (Leaf Stem) – 1,368
- KT7C (Leaf Stem) – 3,476
- KR2B (Root) – 4,351
- KR3B (Root) – 5,288
- KG9B (Seed) – 4,361
- KP1B (Seedling) – 4,692

**TOBEST**

Stigma/Style – 11,216 (6,177 clusters)

**B**

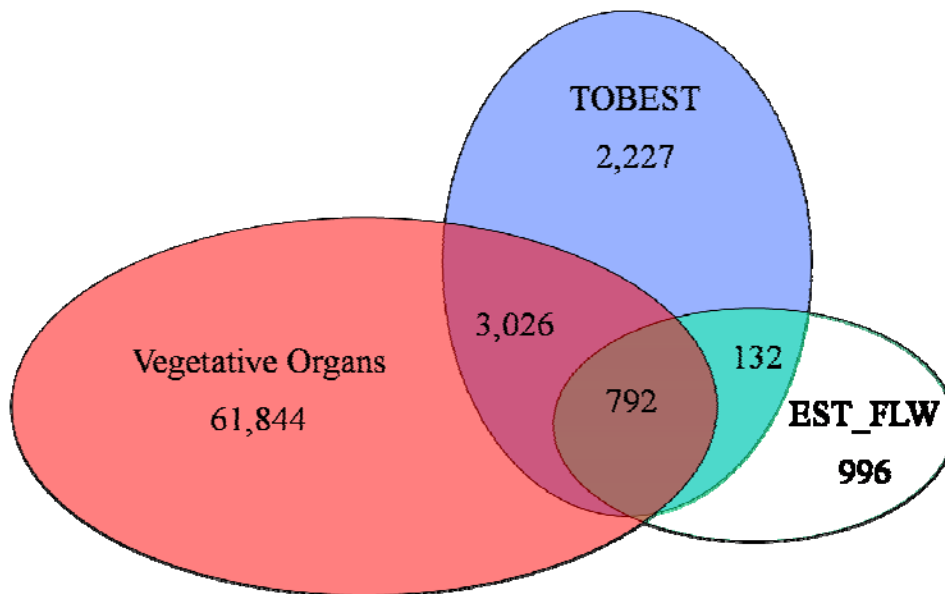

**Total number of ESTs in each of the cDNA libraries:**

AGN\_ELP (Expanded Leaf EST) – 9,984  
AGN\_RNC (Root Normalized EST) – 22,174  
AGN\_RPC (Root Primary Cluster) – 9,984  
CHO\_SL (Senescent Leaf EST library) – 11,040  
EST\_AXB (Axillary Bud EST library) – 1,536  
EST\_CSP (Cold Stressed Plant EST library) – 6,912  
EST\_FLW (Flower EST library) – 1,920  
EST\_YP (Young Plant EST library) – 1,536  
SAL\_KST (Root Normalized EST library) – 2,496

**TOBEST**

Stigma/Style – 11,216 (6,177 clusters)

**Supplemental Figure S4:** Venn diagrams showing the overlap between the transcriptome datasets contained at the ESTobacco (**A**) and TGI – NCSU (**B**) sites (available in July 2008) with the TOBEST. Note that the numbers represent the individual reads of each of the ESTobacco and TGI cDNA libraries without assembly of the sequences into the corresponding clusters, while for the TOBEST dataset the numbers represent clusters (transcripts/genes).
