# Supplementary material
Source: PubMed Central journal article supplement (PMC2649396)
Supplement: pp.108.131573_5.pdf [file pp.108.131573_5.pdf]

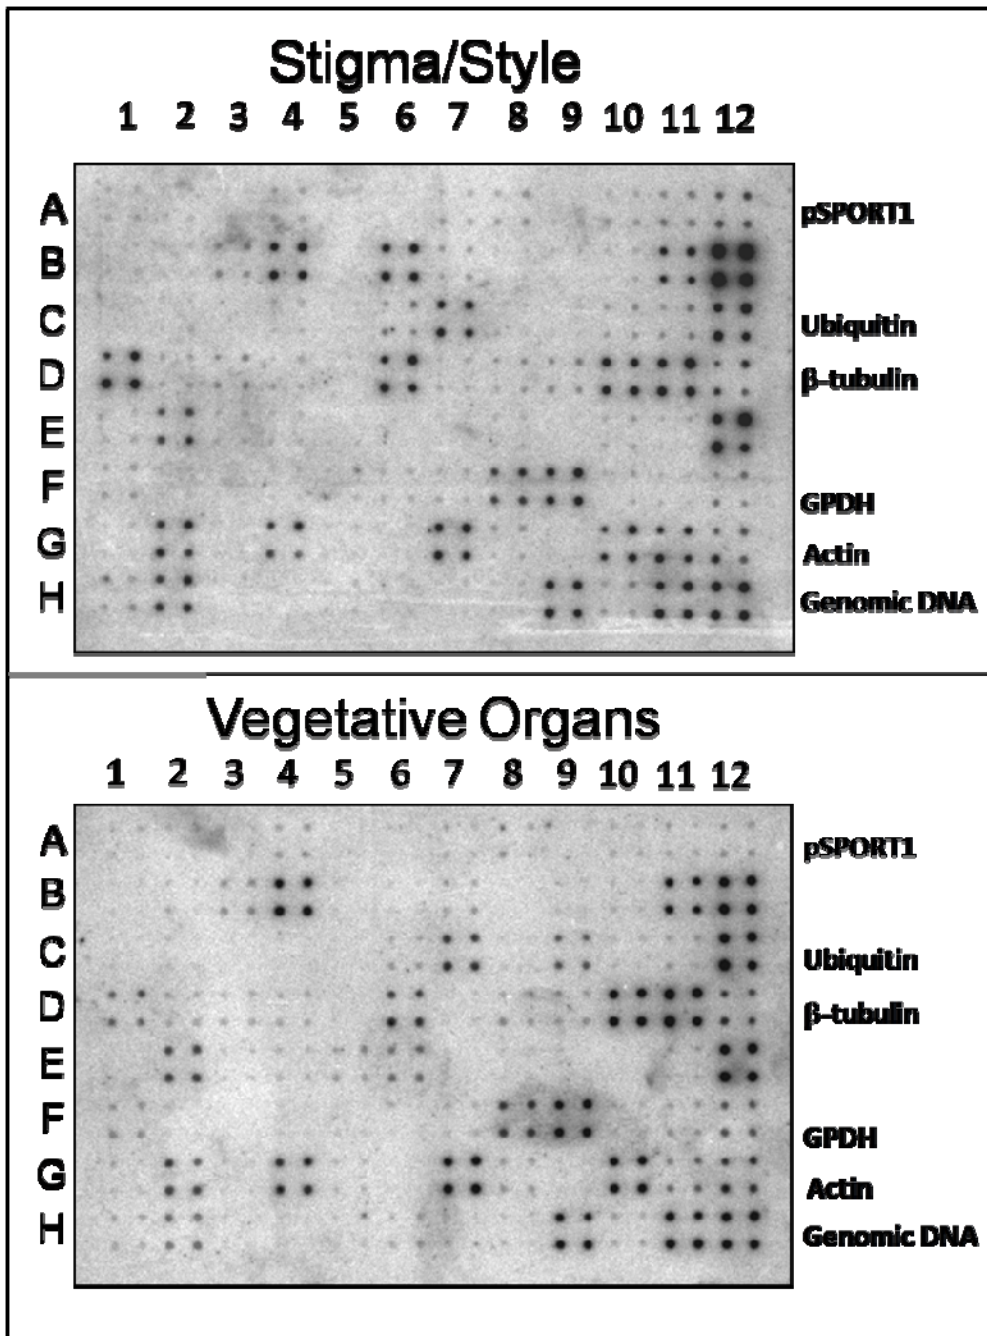

**Supplemental Figure S5:** Images obtained at the Phosphoimager Fla3000-G from a pair of hybridized membranes of the macroarray analysis. Stigmas/styles and vegetative organs (a mixture of roots, stems, leaves, sepals and petals) cDNA probes were prepared and equal amounts of radioactively labeled samples were separately hybridized to the nylon membranes.
