# Supplementary material
Source: PubMed Central journal article supplement (PMC2649396)
Supplement: pp.108.131573_7.pdf [file pp.108.131573_7.pdf]

**Supplemental Table S1:** TOBEST sequences containing a putative signal peptide or containing a putative signal anchor, as established by the SignalP analysis of the cDNAs complete at the 5' end.

---

**TOBEST sequences containing a putative signal peptide**

---

|            |                                                                                             |
|------------|---------------------------------------------------------------------------------------------|
| TOBC002B01 | unnamed protein product [ <i>Vitis vinifera</i> ]                                           |
| TOBC003A08 | unnamed protein product [ <i>Vitis vinifera</i> ]                                           |
| TOBC004B03 | unnamed protein product [ <i>Vitis vinifera</i> ]                                           |
| TOBC006A07 | lipid transfer protein [ <i>Nicotiana tabacum</i> ]                                         |
| TOBC006E06 | thionin like protein [ <i>Nicotiana tabacum</i> ]                                           |
| TOBC008H09 | PiHTL-B [ <i>Petunia inflata</i> ]                                                          |
| TOBC009A04 | translocon-associated protein beta family protein-like [ <i>Solanum tuberosum</i> ]         |
| TOBC009G01 | constitutive plastid-lipid associated protein [ <i>Solanum lycopersicum</i> ]               |
| TOBC010A03 | unnamed protein product [ <i>Vitis vinifera</i> ]                                           |
| TOBC013C09 | proline-rich protein [ <i>Capsicum annuum</i> ]                                             |
| TOBC014C07 | unnamed protein product [ <i>Vitis vinifera</i> ]                                           |
| TOBC014G03 | thionin like protein [ <i>Nicotiana tabacum</i> ]                                           |
| TOBC015G11 | pectinesterase [ <i>Prunus persica</i> ]                                                    |
| TOBC016A09 | trypsin proteinase inhibitor precursor [ <i>Nicotiana attenuata</i> ]                       |
| TOBC017A06 | trypsin proteinase inhibitor precursor [ <i>Nicotiana rustica</i> ]                         |
| TOBC017D11 | hypothetical protein [ <i>Vitis vinifera</i> ]                                              |
| TOBC017E11 | unknown [ <i>Solanum tuberosum</i> ]                                                        |
| TOBC017F03 | biotic cell death-associated protein [ <i>Nicotiana glutinosa</i> ]                         |
| TOBC017F08 | c subunit of V-type ATPase [ <i>Nicotiana tabacum</i> ]                                     |
| TOBC017H10 | putative S-RNase binding protein p11 precursor [ <i>Nicotiana alata</i> ]                   |
| TOBC018D07 | TA20 [ <i>Nicotiana tabacum</i> ]                                                           |
| TOBC019H05 | c subunit of V-type ATPase [ <i>Nicotiana tabacum</i> ]                                     |
| TOBC020B01 | pectinacylesterase precursor [ <i>Vigna radiata</i> var. <i>radiata</i> ]                   |
| TOBC021C11 | constitutive plastid-lipid associated protein [ <i>Solanum lycopersicum</i> ]               |
| TOBC021D05 | lipid transfer protein [ <i>Nicotiana tabacum</i> ]                                         |
| TOBC023D01 | putative lipid transfer protein [ <i>Solanum tuberosum</i> ]                                |
| TOBC023G08 | putative lesion-inducing protein [ <i>Capsicum annuum</i> ]                                 |
| TOBC026A06 | non-specific lipid transfer protein [ <i>Nicotiana tabacum</i> ]                            |
| TOBC026A08 | PSI-H precursor [ <i>Nicotiana sylvestris</i> ]                                             |
| TOBC031C03 | NtEIG-E80 [ <i>Nicotiana tabacum</i> ]                                                      |
| TOBC032E07 | unnamed protein product [ <i>Vitis vinifera</i> ]                                           |
| TOBC033E12 | elicitor-inducible protein EIG-J7 [ <i>Capsicum annuum</i> ]                                |
| TOBC034D02 | putative proteinase inhibitor [ <i>Nicotiana glutinosa</i> ]                                |
| TOBC034H11 | 60s acidic ribosomal protein-like protein [ <i>Solanum tuberosum</i> ]                      |
| TOBC035A07 | unknown                                                                                     |
| TOBC035B05 | putative wound-induced protein [ <i>Arabidopsis thaliana</i> ]                              |
| TOBC035B10 | glucan endo-1,3-beta-glucosidase [ <i>Nicotiana tabacum</i> ]                               |
| TOBC035H12 | glucan endo-1,3-beta-glucosidase [ <i>Nicotiana tabacum</i> ]                               |
| TOBC039H06 | unnamed protein product [ <i>Vitis vinifera</i> ]                                           |
| TOBC040G09 | unnamed protein product [ <i>Vitis vinifera</i> ]                                           |
| TOBC042A10 | gip1 [ <i>Petunia x hybrida</i> ]                                                           |
| TOBC042D04 | flower-specific thionin [ <i>Nicotiana tabacum</i> ]                                        |
| TOBC052B07 | photosystem I light-harvesting chlorophyll a/b-binding protein [ <i>Nicotiana tabacum</i> ] |

TOBC052D02 calreticulin [*Nicotiana plumbaginifolia*]  
TOBC053E11 unnamed protein product [*Vitis vinifera*]  
TOBC054G04 trypsin proteinase inhibitor precursor [*Nicotiana tabacum*]  
TOBC057B05 cysteine-rich extensin-like protein  
TOBC057D03 unnamed protein product [*Vitis vinifera*]  
TOBC058A11 proline-rich protein [*Capsicum annuum*]  
TOBC058E04 proteinase inhibitor I precursor-like [*Solanum tuberosum*]  
TOBC058E08 unnamed protein product [*Vitis vinifera*]  
TOBC061F07 unnamed protein product [*Vitis vinifera*]  
TOBC062A05 beta-expansin-like protein [*Nicotiana tabacum*]  
TOBC067A06 S-adenosyl-methionine-sterol-C- methyltransferase [*Nicotiana tabacum*]  
TOBC069G06 unnamed protein product [*Vitis vinifera*]  
TOBC070E04 similar to ATP synthase subunit H protein [*Solanum lycopersicum*]  
TOBC071A02 HT-protein [*Nicotiana alata*]  
TOBC074H11 PSI-D2 [*Nicotiana sylvestris*]  
TOBC076C04 unnamed protein product [*Vitis vinifera*]  
TOBC076H08 cysteine-rich protein [*Nicotiana tabacum*]  
TOBC079H03 STIG1 [*Nicotiana tabacum*]  
TOBC080A12 unnamed protein product [*Vitis vinifera*]  
TOBC080B09 mitochondrial small heat shock protein [*Solanum lycopersicum*]  
TOBC080F08 flower-specific thionin [*Nicotiana tabacum*]  
TOBC080G12 unnamed protein product [*Vitis vinifera*]  
TOBC081C09 cysteine-rich protein [*Nicotiana tabacum*]  
TOBC081E10 putative lipid transfer protein [*Solanum tuberosum*]  
TOBC086B02 unnamed protein product [*Vitis vinifera*]  
TOBC086E11 hypothetical protein [*Phaseolus vulgaris*]  
TOBC087D06 unnamed protein product [*Vitis vinifera*]  
TOBC088G08 LAT52 [*Solanum lycopersicum*]  
TOBC091A11 peptidylprolyl isomerase [*Triticum aestivum*]  
TOBC091B10 PSI-D2 [*Nicotiana sylvestris*]  
TOBC091D12 putative protein [*Arabidopsis thaliana*]  
TOBC092E03 ribosomal Pr 117 [*Triticum aestivum*]  
TOBC092E04 At2g42840 [*Arabidopsis thaliana*]  
TOBC092H07 vacuolar membrane ATPase subunit c" [*Citrus limon*]  
TOBC093C09 unnamed protein product [*Vitis vinifera*]  
TOBC093H12 unnamed protein product [*Vitis vinifera*]  
TOBC094G11 proteinase inhibitor II [*Nicotiana tabacum*]  
TOBC095D06 unnamed protein product [*Vitis vinifera*]  
TOBC096B07 Signal peptidase 22 kDa subunit [*Medicago truncatula*]  
TOBC096H10 unnamed protein product [*Capsicum annuum*]  
TOBC097E01 cytochrome c oxidase family protein-like [*Solanum tuberosum*]  
TOBC099G06 Hypothetical Protein [*Arabidopsis thaliana*]  
TOBC100B11 LRR protein [*Solanum lycopersicum*]  
TOBC103B01 HT-protein [*Nicotiana alata*]  
TOBC103C01 ribosomal Pr 117 [*Triticum aestivum*]  
TOBC103G01 cysteine-rich extensin-like protein-1  
TOBC103H04 gamma-thionin [*Nicotiana paniculata*]  
TOBC107D02 ribosomal Pr 117 [*Triticum aestivum*]  
TOBC110B05 unnamed protein product [*Vitis vinifera*]  
TOBC110G03 unnamed protein product [*Vitis vinifera*]

TOBC112F03 unnamed protein product [*Vitis vinifera*]  
TOBC120B10 unnamed protein product [*Vitis vinifera*]  
TOBC123E10 lipid transfer protein [*Sesamum indicum*]  
TOBC123G03 unnamed protein product [*Vitis vinifera*]  
TOBC123H07 unnamed protein product [*Capsicum annuum*]  
TOBC124B08 putative anti-PCD protein [*Lycopersicon esculentum*]  
TOBC125C07 unknown [*Capsicum annuum*]  
TOBC130E11 thionin like protein [*Nicotiana tabacum*]  
TOBC130G07 unnamed protein product [*Vitis vinifera*]  
TOBC131D06 unnamed protein product [*Vitis vinifera*]  
TOBC132E06 CAPIP2 [*Capsicum annuum*]  
TOBC134E04 thaumatin-like protein SE39b [*Nicotiana tabacum*]  
TOBS001B12 S-adenosyl-methionine-sterol-C- methyltransferase [*Nicotiana tabacum*]  
TOBS002F10 cysteine-rich extensin-like protein-1  
TOBS002H09 unnamed protein product [*Vitis vinifera*]  
TOBS004H09 unnamed protein product [*Vitis vinifera*]  
TOBS004H10 ORF; able to induce HR-like lesions [*Nicotiana tabacum*]  
TOBS005F05 peroxidase  
TOBS007A07 unnamed protein product [*Vitis vinifera*]  
TOBS015D07 SIEP1L protein [*Beta vulgaris* subsp. *vulgaris*]  
TOBS018H10 unknown protein [*Arabidopsis thaliana*]  
TOBS019D11 unnamed protein product [*Vitis vinifera*]  
TOBS019H11 P-rich protein EIG-I30 [*Nicotiana tabacum*]  
TOBS020C08 unnamed protein product [*Vitis vinifera*]  
TOBS021H08 cysteine-rich protein [*Nicotiana tabacum*]  
TOBS022C10 proline-rich protein [*Solanum tuberosum*]  
TOBS023B03 hypothetical protein MtrDRAFT\_AC136139g5v2 [*Medicago truncatula*]  
TOBS023H06 ORF; able to induce HR-like lesions [*Nicotiana tabacum*]  
TOBS026A09 stress regulated protein [*Lycopersicon esculentum*]  
TOBS031G11 ORF; able to induce HR-like lesions [*Nicotiana tabacum*]  
TOBS032C05 ntp201 [*Nicotiana tabacum*]  
TOBS032E11 proteinase inhibitor isoform [*Solanum phureja*]  
TOBS035H09 gip1 [*Petunia x hybrida*]  
TOBS036D04 trypsin proteinase inhibitor precursor [*Nicotiana rustica*]  
TOBS039C03 unnamed protein product [*Vitis vinifera*]  
TOBS039F01 aspartate aminotransferase-like [*Solanum tuberosum*]  
TOBS042A04 external rotenone-insensitive NADPH dehydrogenase [*Solanum tuberosum*]  
TOBS042C11 unnamed protein product [*Vitis vinifera*]  
TOBS043D05 cysteine-rich extensin-like protein-1  
TOBS046E12 putative DnaJ protein [*Arabidopsis thaliana*]  
TOBS046G06 germin-like protein [*Nicotiana attenuata*]  
TOBS048B04 unnamed protein product [*Vitis vinifera*]  
TOBS048C07 unnamed protein product [*Vitis vinifera*]  
TOBS050A11 P18 protein [*Nicotiana alata*]  
TOBS050D06 alpha-expansin precursor [*Nicotiana tabacum*]  
TOBS051D06 hypothetical protein [*Vitis vinifera*]  
TOBS054D08 unnamed protein product [*Vitis vinifera*]  
TOBS055B09 AC009176\_2 unknown protein [*Arabidopsis thaliana*]  
TOBS056E03 unnamed protein product [*Vitis vinifera*]  
TOBS059B06 unnamed protein product [*Vitis vinifera*]

TOBS059E07 unnamed protein product [*Vitis vinifera*]  
TOBS061B09 unnamed protein product [*Vitis vinifera*]  
TOBS061G08 inorganic pyrophosphatase [*Nicotiana rustica*]  
TOBS063G12 unnamed protein product [*Vitis vinifera*]  
TOBS064C10 lipid transfer protein [*Nicotiana tabacum*]  
TOBS065B04 lipid transfer protein 1 precursor [*Nicotiana tabacum*]  
TOBS068H04 obtusifoliol-14-demethylase [*Nicotiana tabacum*]  
TOBS069C11 unnamed protein product [*Vitis vinifera*]  
TOBS070C10 unnamed protein product [*Vitis vinifera*]  
TOBS070G10 hypothetical protein [*Nicotiana tabacum*]  
TOBS073D11 unnamed protein product [*Vitis vinifera*]  
TOBS074F07 acidic beta-1,3-glucanase  
TOBS075A12 putative 16kDa membrane protein [*Nicotiana tabacum*]  
TOBS075E02 AT5g14320/F18O22\_110 [*Arabidopsis thaliana*]  
TOBS078E09 hypothetical protein [*Vitis vinifera*]  
TOBS081C08 ribosomal protein L27  
TOBS084D02 mitochondrial prohibitin 1 [*Petunia x hybrida*]  
TOBS089A04 At2g35795 [*Arabidopsis thaliana*]  
TOBS090C06 1211235G ATPase III  
TOBS091G04 putative anti-PCD protein [*Lycopersicon esculentum*]  
TOBS091H10 cysteine-rich extensin-like protein-3  
TOBS092H03 trypsin proteinase inhibitor precursor [*Nicotiana glauca*]  
TOBS093D11 TPA: TPA\_exp: putative phytosulfokine peptide precursor [*Solanum tuberosum*]  
TOBS094A05 LRR protein [*Solanum lycopersicum*]  
TOBS096G04 hypothetical protein [*Vitis vinifera*]  
TOBS100A08 plasma membrane associated protein-like [*Arabidopsis thaliana*]  
TOBS100B01 Os07g0192300 [*Oryza sativa*]  
TOBS100B10 unnamed protein product [*Vitis vinifera*]  
TOBS102B09 unnamed protein product [*Vitis vinifera*]  
TOBS104E07 putative anti-PCD protein [*Lycopersicon esculentum*]  
TOBS106D09 hypothetical protein [*Arabidopsis thaliana*]  
TOBS109E02 hypothetical protein [*Phaseolus vulgaris*]  
TOBS109F03 hypothetical protein [*Vitis vinifera*]  
TOBS109G09 Rieske FeS [*Nicotiana tabacum*]  
TOBS111H12 non-cell-autonomous protein pathway1; plasmodesmal receptor [*Nicotiana tabacum*]  
TOBS117E08 putative reductase [*Nicotiana tabacum*]  
TOBS119C02 c subunit of V-type ATPase [*Nicotiana tabacum*]  
TOBS119D06 RALF precursor [*Nicotiana tabacum*]  
TOBS120G10 endo-1,3-beta-glucanase-like protein [*Pyrus pyrifolia*]  
TOBS120H06 RALF precursor [*Nicotiana tabacum*]  
TOBS120H08 unnamed protein product [*Vitis vinifera*]  
TOBS121C07 unnamed protein product [*Vitis vinifera*]  
TOBS121G05 photosystem I light-harvesting chlorophyll a/b-binding protein [*Nicotiana tabacum*]  
TOBS122F10 unnamed protein product [*Vitis vinifera*]  
TOBS125G11 Signal peptidase 22 kDa subunit [*Medicago truncatula*]  
TOBS129B04 cysteine-rich extensin-like protein  
TOBS129B08 unnamed protein product [*Vitis vinifera*]

TOBS129E11 putative purple acid phosphatase precursor [*Ipomoea batatas*]  
 TOBS129G04 unnamed protein product [*Vitis vinifera*]  
 TOBS131B02 germin-like protein [*Nicotiana attenuata*]  
 TOBS132C06 unnamed protein product [*Vitis vinifera*]  
 TOBS134G05 elicitor-inducible protein EIG-J7 [*Capsicum annuum*]

---

**TOBEST sequences containing a putative signal anchor**

---

TOBC005A10 hypothetical protein MtrDRAFT\_AC150776g30v2 [*Medicago truncatula*]  
 TOBC006D10 unnamed protein product [*Vitis vinifera*]  
 TOBC014G02 unnamed protein product [*Vitis vinifera*]  
 TOBC016F07 hypothetical protein [*Vitis vinifera*]  
 TOBC038E08 unnamed protein product [*Vitis vinifera*]  
 TOBC039B04 homolog of defender against apoptotic death 1 homolog [*Nicotiana suaveolens* x *Nicotiana tabacum*]  
 TOBC040B11 B12D protein [*Ipomoea batatas*]  
 TOBC040D01 unknown [*Solanum tuberosum*]  
 TOBC042A06 unnamed protein product [*Vitis vinifera*]  
 TOBC047B06 unknown protein [*Arabidopsis thaliana*]  
 TOBC055D02 Microsomal signal peptidase 12 kDa subunit family protein [*Oryza sativa*]  
 TOBC055E06 unnamed protein product [*Vitis vinifera*]  
 TOBC059E06 unnamed protein product [*Vitis vinifera*]  
 TOBC071D04 low temperature and salt responsive protein [*Solanum tuberosum*]  
 TOBC073A09 unnamed protein product [*Vitis vinifera*]  
 TOBC074D02 homolog of defender against apoptotic death 1 homolog [*Nicotiana suaveolens* x *Nicotiana tabacum*]  
 TOBC079E11 unnamed protein product [*Vitis vinifera*]  
 TOBC084D08 B12D protein [*Ipomoea batatas*]  
 TOBC088H01 unnamed protein product [*Vitis vinifera*]  
 TOBC091G07 unknown protein [*Arabidopsis thaliana*]  
 TOBC092G02 protein transport protein SEC61 gamma subunit-like [*Arabidopsis thaliana*]  
 TOBC095G12 unnamed protein product [*Vitis vinifera*]  
 TOBC097A12 Os05g0103800 [*Oryza sativa*]  
 TOBC109B10 protein transport protein SEC61 gamma subunit-like [*Arabidopsis thaliana*]  
 TOBC109F07 protein transport protein SEC61 gamma subunit-like [*Arabidopsis thaliana*]  
 TOBC110H01 unnamed protein product [*Vitis vinifera*]  
 TOBC113H11 unnamed protein product [*Vitis vinifera*]  
 TOBC118A10 unnamed protein product [*Vitis vinifera*]  
 TOBC120D05 unknown [*Solanum tuberosum*]  
 TOBC124B09 putative transport protein SEC61 beta-subunit [*Arabidopsis thaliana*]  
 TOBC130D05 Microsomal signal peptidase 12 kDa subunit family protein [*Oryza sativa*]  
 TOBC130G03 AT5g49540/K6M13\_9 [*Arabidopsis thaliana*]  
 TOBC131B05 AF273333\_9 BAC19.9 [*Lycopersicon esculentum*]  
 TOBC132C12 hypothetical protein [*Capsicum chinense*]  
 TOBS002C02 At3g15395 [*Arabidopsis thaliana*]  
 TOBS004C06 hypothetical protein OsJ\_020880 [*Oryza sativa*]  
 TOBS005F09 hypothetical protein OsI\_012174 [*Oryza sativa*]  
 TOBS007H08 unnamed protein product [*Vitis vinifera*]  
 TOBS010B05 squalene monooxygenase [*Datura innoxia*]

TOBS011B05 putative transport protein SEC61 beta-subunit [*Arabidopsis thaliana*]  
TOBS014A07 low temperature and salt responsive protein [*Solanum tuberosum*]  
TOBS018H11 At2g31490 [*Arabidopsis thaliana*]  
TOBS020G04 unnamed protein product [*Vitis vinifera*]  
TOBS027B08 hypothetical protein [*Arabidopsis thaliana*]  
TOBS031E10 unnamed protein product [*Vitis vinifera*]  
TOBS032B09 hypothetical protein [*Vitis vinifera*]  
TOBS036G05 unnamed protein product [*Vitis vinifera*]  
TOBS039A11 unnamed protein product [*Vitis vinifera*]  
TOBS039H03 unnamed protein product [*Vitis vinifera*]  
TOBS041E06 unnamed protein product [*Vitis vinifera*]  
TOBS051H10 root-specific metal transporter [*Lycopersicon esculentum*]  
TOBS055A01 protein transport protein SEC61 gamma subunit-like [*Arabidopsis thaliana*]  
TOBS055A02 unnamed protein product [*Vitis vinifera*]  
TOBS055B01 UDP-D-glucuronate 4-epimerase [*Arabidopsis thaliana*]  
TOBS060E05 unnamed protein product [*Vitis vinifera*]  
TOBS065E09 putative UDP-glucuronate decarboxylase 3 [*Nicotiana tabacum*]  
TOBS069A05 low temperature and salt responsive protein [*Solanum tuberosum*]  
TOBS070A03 hypothetical protein OsI\_012174 [*Oryza sativa*]  
TOBS070A05 unnamed protein product [*Vitis vinifera*]  
TOBS073B01 homogentisate phytyltransferase VTE2-1 [*Glycine max*]  
TOBS075B11 unnamed protein product [*Vitis vinifera*]  
TOBS089A12 unnamed protein product [*Vitis vinifera*]  
TOBS096C08 unnamed protein product [*Vitis vinifera*]  
TOBS098A07 unnamed protein product [*Vitis vinifera*]  
TOBS098G04 unnamed protein product [*Vitis vinifera*]  
TOBS107E02 unnamed protein product [*Vitis vinifera*]  
TOBS108A05 hypothetical protein [*Vitis vinifera*]  
TOBS108C02 tobamovirus multiplication 1 [*Nicotiana tabacum*]  
TOBS109B03 hypothetical protein OsJ\_009763 [*Oryza sativa*]  
TOBS114C11 pectin methylesterase 1 [*Pyrus communis*]  
TOBS117F05 ER lumen retaining receptor family-like protein [*Solanum tuberosum*]  
TOBS120G05 hypothetical protein MtrDRAFT\_AC150776g30v2 [*Medicago truncatula*]  
TOBS124G05 protein transport protein SEC61 gamma subunit-like [*Arabidopsis thaliana*]  
TOBS129G09 Bax inhibitor 1 [*Nicotiana tabacum*]
