# Supplementary material
Source: PubMed Central journal article supplement (PMC2649396)
Supplement: pp.108.131573_8.pdf [file pp.108.131573_8.pdf]

**Supplemental Table S3:** List of the *Arabidopsis* sequences from the pistil data set described at the article of Tung et al. (2005), for which there are ‘true homologous’ sequences in the TOBEST database.

| Query                    | TOBEST ID | Gene Description (Function or Comment)                                                             |
|--------------------------|-----------|----------------------------------------------------------------------------------------------------|
| At4g11820                | C001F12   | HMGS, MVA1, BAP1   BAP1 (hydroxymethylglutaryl-Co synthase)                                        |
| At4g27590                | C016D02   | copper-binding protein-related                                                                     |
| At2g02850 <sup>a,c</sup> | C017H10   | ARPN (PLANTACYANIN); copper ion binding                                                            |
| At3g24100                | C022F07   | similar to four F5 protein-related / 4F5 protein-related [ <i>Arabidopsis thaliana</i> ]           |
| At1g21750 <sup>a</sup>   | C027A09   | ATPDIL1-1 (PDI-LIKE 1-1); protein disulfide isomerase                                              |
| At2g45290                | C035E09   | transketolase, putative                                                                            |
| At5g40350                | C089F04   | AtMYB24, MYB24 (myb domain protein 24); DNA binding / transcription factor                         |
| At5g61790 <sup>a</sup>   | C095E10   | calnexin 1 (CNX1)                                                                                  |
| At5g25350                | C102G12   | EBF2 (EIN3-BINDING F BOX PROTEIN 2)                                                                |
| At4g19810 <sup>b</sup>   | C106G05   | glycosyl hydrolase family 18 protein, putative chitinase                                           |
| At1g12230                | C106H10   | transaldolase, putative                                                                            |
| At4g00360 <sup>a</sup>   | C107D01   | ATT1, CYP86A2 (ABERRANT INDUCTION OF TYPE THREE GENES 1); oxygen binding; putative cytochrome P450 |
| At5g43150                | C121A07   | similar to hypothetical protein MtrDRAFT_AC141109g4v1 [ <i>Medicago truncatula</i> ]               |
| At1g63220                | C131F04   | C2 domain-containing protein                                                                       |
| At4g21620 <sup>a</sup>   | S005G10   | glycine-rich protein                                                                               |
| At1g14360 <sup>a</sup>   | S010A07   | ATUTR3/UTR3 (UDP-GALACTOSE TRANSPORTER 3); pyrimidine nucleotide sugar transporter                 |
| At1g04980                | S015B02   | ATPDIL2-2 (PDI-LIKE 2-2); thiol-disulfide exchange intermediate                                    |
| At4g31860                | S018D05   | protein phosphatase 2C, putative / PP2C, putative                                                  |
| At4g38770 <sup>a</sup>   | S022C10   | ATPRP4, PRP4 (PROLINE-RICH PROTEIN 4)                                                              |
| At3g15820                | S058B08   | phosphatidic acid phosphatase-related / PAP2-related                                               |
| At5g15530                | S061G01   | BCCP2, CAC1-B   BCCP2 (biotin carboxyl carrier protein 2); biotin binding                          |
| At1g31812                | S073D03   | ACBP (ACYL-COA-BINDING PROTEIN); acyl-CoA binding                                                  |
| At5g64510                | S093G08   | similar to ORF; able to induce HR-like lesions [ <i>Nicotiana tabacum</i> ]                        |
| At4g18910                | S107B05   | NIP1;2/NLM2 (NOD26-like intrinsic protein 1;2); water channel                                      |
| At2g25110 <sup>a</sup>   | S121B12   | SDF2   MIR domain-containing protein; unknown protein                                              |
| At2g17880                | S122C03   | DNAJ heat shock protein, putative                                                                  |
| At5g57900                | S130H05   | SKIP1 (SKP1 INTERACTING PARTNER 1)                                                                 |
| At3g14380                | S132B08   | integral membrane family protein                                                                   |

- a. Papillar cell-specific genes predicted to encode secreted proteins (Table I from Tung et al., 2005)  
b. Transmitting tract-specific genes predicted to encode secreted proteins (Table II from Tung et al., 2005)  
c. Genes previously implicated in the pollen-pistil interactions of *Brassica*, *Arabidopsis* and lily (Table III from Tung et al., 2005)
