# Supplementary material
Source: PubMed Central journal article supplement (PMC2649396)
Supplement: pp.108.131573_9.pdf [file pp.108.131573_9.pdf]

**Supplemental Table S4:** List of the *Arabidopsis* sequences from the pistil data set described at the article of Swanson et al. (2005), for which there are ‘true homologous’ sequences in the TOBEST database.

| Query                  | TOBEST ID | Gene Description (Function or Comment)                                                                                                                   |
|------------------------|-----------|----------------------------------------------------------------------------------------------------------------------------------------------------------|
| At3g09350              | C003H02   | armadillo/beta-catenin repeat family protein                                                                                                             |
| At3g12390              | C007F02   | nascent polypeptide associated complex alpha chain protein, putative / alpha-NAC, putative                                                               |
| At5g14030              | C009A04   | translocon-associated protein beta (TRAPB) family protein                                                                                                |
| At1g30510              | C013C06   | ATRFNR2 (root FNR 2); oxidoreductase                                                                                                                     |
| At5g40370              | C013H11   | glutaredoxin, putative                                                                                                                                   |
| At3g08640              | C014C07   | alphavirus core protein family                                                                                                                           |
| At3g09390              | C017F05   | ATMT-K, ATMT-1, MT2, MT2A (metallothionein 2A)                                                                                                           |
| At2g02850              | C017H10   | ARPN (plantacyanin); copper ion binding                                                                                                                  |
| At1g44575              | C018C06   | PSBS, NPQ4 (nonphotochemical quenching)                                                                                                                  |
| At3g16140              | C018G07   | PSAH-1 (photosystem I subunit H-1)                                                                                                                       |
| At1g70330              | C018H01   | ENT1, AT (equilibrative nucleotide transporter 1); nucleoside transporter                                                                                |
| At4g02890              | C018H09   | UBQ14 (ubiquitin 14); protein binding                                                                                                                    |
| At3g18280              | C023D01   | protease inhibitor/seed storage/lipid transfer protein (LTP) family protein                                                                              |
| At2g24940              | C025D02   | ATMAPR2 ( <i>Arabidopsis thaliana</i> membrane-associated progesterone binding protein 2); heme binding/transition metal ion                             |
| At5g47030              | C027E12   | ATP synthase delta' chain, mitochondrial                                                                                                                 |
| At5g53300              | C028D10   | UBC10 (ubiquitin-conjugating enzyme 10); ubiquitin-protein ligase                                                                                        |
| At1g64660              | C031E08   | ATMGL; catalytic/ methionine gamma-lyase                                                                                                                 |
| At1g51980              | C032B03   | mitochondrial processing peptidase alpha subunit, putative                                                                                               |
| At4g11600              | C033G09   | PHGPX, LSC803, ATGPX6 (glutathione peroxidase 6); glutathione peroxidase                                                                                 |
| At2g45290              | C035E09   | transketolase, putative                                                                                                                                  |
| At1g76200              | C037B06   | similar to conserved hypothetical protein [ <i>Medicago truncatula</i> ] (GB:ABE89059.1)                                                                 |
| At2g37110              | C041E09   | similar to unknown protein [ <i>Arabidopsis thaliana</i> ] (TAIR:AT2G40935.1); similar to uncharacterized Cys-rich domain [ <i>Medicago truncatula</i> ] |
| At3g46450              | C046E11   | SEC14 cytosolic factor family protein / phosphoglyceride transfer family protein                                                                         |
| At1g27400              | C047C11   | 60S ribosomal protein L17 (RPL17A)                                                                                                                       |
| At5g43330              | C049A05   | malate dehydrogenase, cytosolic, putative                                                                                                                |
| At1g53130              | C054D09   | stigma-specific Stig1 family protein                                                                                                                     |
| At5g51970              | C056B05   | sorbitol dehydrogenase, putative / L-iditol 2-dehydrogenase, putative                                                                                    |
| At3g51250              | C057D08   | senescence/dehydration-associated protein-related                                                                                                        |
| At1g72650              | C058A01   | TRFL6 (TRF-LIKE 6); DNA binding / transcription factor                                                                                                   |
| At4g35000              | C059C07   | APX3 (ascorbate peroxidase 3); L-ascorbate peroxidase                                                                                                    |
| At3g20320              | C062D04   | TGD2 (trigalactosyldiacylglycerol2)                                                                                                                      |
| At4g17670              | C064E12   | senescence-associated protein-related                                                                                                                    |
| At1g16210              | C078E10   | similar to cupin family protein [ <i>Arabidopsis thaliana</i> ] (TAIR:AT2G18540.1);                                                                      |
| At4g35100              | C085F10   | PIP3A, PIP2;7, SIMIP, PIP3 (plasma membrane intrinsic protein 3); water channel                                                                          |
| At4g34265              | C087D06   | similar to unknown protein [ <i>Arabidopsis thaliana</i> ] (TAIR:AT2G15000.5)                                                                            |
| At1g64670              | C092C05   | BDG1 (BODYGUARD1); hydrolase                                                                                                                             |
| At2g30570              | C095D06   | PSBW   photosystem II reaction center W (PsbW) protein-related                                                                                           |
| At5g53920              | C095H09   | ribosomal protein L11 methyltransferase-related                                                                                                          |
| At5g54770              | C096F01   | TZ, THI1   THI1 (thiazole requiring)                                                                                                                     |
| At1g08830              | C100B03   | CSD1 (copper/zinc superoxide dismutase 1)                                                                                                                |
| At4g08240              | C102E08   | similar to Os02g0567000 [ <i>Oryza sativa</i> (japonica cultivar-group)]                                                                                 |
| At2g37170 <sup>a</sup> | C103C08   | PIP2;2, PIP2B (plasma membrane intrinsic protein 2;2); water channel                                                                                     |
| At2g20340 <sup>a</sup> | C104G09   | tyrosine decarboxylase, putative                                                                                                                         |
| At1g32230              | C105C07   | CEO, ATP8, CEO1, RCD1   RCD1 (radical-induced cell death1)                                                                                               |
| At1g70370              | C107C01   | BURP domain-containing protein / polygalacturonase, putative                                                                                             |
| At4g00360              | C107D01   | ATT1, CYP86A2   CYP86A2 (aberrant induction of type three genes 1); oxygen binding                                                                       |
| At3g48690              | C109A07   | similar to unknown protein [ <i>Arabidopsis thaliana</i> ] (TAIR:AT3G48700.1); similar to Esterase/lipase/thioesterase [ <i>Medicago truncatula</i> ]    |
| At1g55810              | C113D09   | uracil phosphoribosyltransferase, putative / UMP pyrophosphorylase, putative                                                                             |
| At1g14450              | C113H11   | similar to unknown protein [ <i>Arabidopsis thaliana</i> ] (TAIR:AT2G02510.1)                                                                            |
| At1g35720              | C114E01   | OXY5, ATOXY5, ANNAT1 (annexin <i>Arabidopsis</i> 1); calcium ion binding/calcium-dependent phospholipid binding                                          |
| At1g24260              | C118G09   | AGL9, SEP3 (SEPALLATA3); transcription factor                                                                                                            |
| At1g06680              | C129E02   | OEE2, PSBP-1 (oxygen-evolving enhancer protein 2); calcium ion binding                                                                                   |

|                        |         |                                                                                                                                                                                    |
|------------------------|---------|------------------------------------------------------------------------------------------------------------------------------------------------------------------------------------|
| At4g09800              | C132G05 | RPS18C (S18 ribosomal protein); structural constituent of ribosome                                                                                                                 |
| At3g53990              | S001A09 | universal stress protein (USP) family protein                                                                                                                                      |
| At3g48860              | S003D07 | similar to unknown protein [ <i>Arabidopsis thaliana</i> ] (TAIR:AT5G23700.1); similar to Esterase/lipase/thioesterase [ <i>Medicago truncatula</i> ]                              |
| At5g52590              | S003E03 | RabGAP/TBC domain-containing protein                                                                                                                                               |
| At3g22845              | S003G12 | emp24/gp25L/p24 protein-related                                                                                                                                                    |
| At3g58460              | S004C02 | rhomboid family protein / ubiquitin-associated (UBA)/TS-N domain-containing protein                                                                                                |
| At4g24190              | S005F01 | SHD (SHEPHERD); ATP binding                                                                                                                                                        |
| At4g38460              | S008C08 | GGR (geranylgeranyl reductase); farnesyltransferase                                                                                                                                |
| At5g13430              | S008E11 | ubiquinol-cytochrome C reductase iron-sulfur subunit, mitochondrial, putative                                                                                                      |
| At3g01320              | S009A03 | similar to paired amphipathic helix repeat-containing protein [ <i>Arabidopsis thaliana</i> ] (TAIR:At1g70060.1); similar to ATSIN3/SIN3 ( <i>Arabidopsis thaliana</i> )           |
| At4g37760              | S010B05 | squalene monooxygenase, putative / squalene epoxidase, putative                                                                                                                    |
| At4g30960              | S013C10 | SIP3, SnRK3.14, CIPK6   CIPK6 (cbl-interacting protein kinase 6); kinase                                                                                                           |
| At5g01410              | S013E03 | ATPDX1.3, RSR4, PDX1 (pyridoxine biosynthesis 1.3); protein heterodimerization / protein homodimerization                                                                          |
| At3g17810              | S014A12 | dihydroorotate dehydrogenase family protein / dihydroorotate oxidase family protein                                                                                                |
| At2g41410              | S016F03 | calmodulin, putative                                                                                                                                                               |
| At5g35360              | S018G10 | CAC2 (acetyl co-enzyme A carboxylase biotin carboxylase subunit)                                                                                                                   |
| At4g24690              | S021D03 | ubiquitin-associated (UBA)/TS-N domain-containing protein / octicosapeptide/Phox/Bemp1 (PB1) domain-containing protein                                                             |
| At1g80360              | S021H02 | aminotransferase class I and II family protein                                                                                                                                     |
| At4g38770 <sup>a</sup> | S022C10 | ATPRP4, PRP4 (proline-rich protein 4)                                                                                                                                              |
| At5g11200              | S024F01 | DEAD/DEAH box helicase, putative                                                                                                                                                   |
| At1g65445              | S024H04 | transferase-related                                                                                                                                                                |
| At5g09230              | S026C08 | SRT2                                                                                                                                                                               |
| At3g59920              | S027H03 | ATGDI2 (rab gdp dissociation inhibitor 2); RAB GDP-dissociation inhibitor                                                                                                          |
| At1g19300              | S029F12 | GATL1/GLZ1/PARVUS (Galacturonosyltransferase-like 1); polygalacturonate 4-alpha-galacturonosyltransferase/ transferase,                                                            |
| At1g14820              | S029H06 | SEC14 cytosolic factor family protein / phosphoglyceride transfer family protein                                                                                                   |
| At1g16890              | S031D02 | UBC36; ubiquitin-protein ligase                                                                                                                                                    |
| At4g00790              | S034E08 | protein binding / zinc ion binding                                                                                                                                                 |
| At3g10410              | S035G09 | SCPL49 (serine carboxypeptidase-like 49); serine carboxypeptidase                                                                                                                  |
| At1g03140              | S036B08 | splicing factor Prp18 family protein                                                                                                                                               |
| At5g42960              | S038F12 | similar to unknown protein [ <i>Arabidopsis thaliana</i> ] (TAIR:At1g45170.1); similar to pore protein of 24 kD (OEP24) [ <i>Pisum sativum</i> ] (GB:CAA04468.1)                   |
| At3g03450              | S040B05 | RGL2 (RGA-LIKE 2); transcription factor                                                                                                                                            |
| At3g52870              | S043C07 | calmodulin-binding family protein E                                                                                                                                                |
| At4g36810              | S045G04 | GGPS1 (geranylgeranyl pyrophosphate synthase 1); farnesyltransferase                                                                                                               |
| At5g23540              | S047C02 | 26S proteasome regulatory subunit, putative                                                                                                                                        |
| At4g26860              | S048C04 | alanine racemase family protein                                                                                                                                                    |
| At1g48090              | S051A12 | C2 domain-containing protein                                                                                                                                                       |
| At3g18790              | S052E10 | similar to 2 coiled coil domains of eukaryotic ori (GB:BAD19345.1); contains InterPro domain Isy1-like splicing; (InterPro:IPR009360)                                              |
| At1g55690              | S056A10 | SEC14 cytosolic factor family protein / phosphoglyceride transfer family protein                                                                                                   |
| At1g15820              | S057H12 | CP24, LHCB6 (light harvesting complex PSII); chlorophyll binding                                                                                                                   |
| At5g27990              | S059C03 | similar to unknown protein [ <i>Arabidopsis thaliana</i> ] (TAIR:At3g22510.1)                                                                                                      |
| At5g15530              | S061G01 | CAC1-B   BCCP2 (biotin carboxyl carrier protein 2); biotin binding                                                                                                                 |
| At2g34480              | S063C11 | 60S ribosomal protein L18A (RPL18aB)                                                                                                                                               |
| At4g38510              | S063H08 | (vacuolar ATP synthase subunit B2); hydrogen ion transporting ATP synthase                                                                                                         |
| At1g65290              | S065A06 | acyl carrier family protein / ACP family protein                                                                                                                                   |
| At3g07220              | S068A01 | transcriptional activator, putative                                                                                                                                                |
| At5g59613              | S070A03 | similar to unknown protein [ <i>Arabidopsis thaliana</i> ] (TAIR:At3g46430.1); similar to mitochondrial ATP synthase 6 KD subunit [ <i>Oryza sativa</i> (japonica cultivar-group)] |
| At3g19020              | S073B03 | leucine-rich repeat family protein / extensin family protein                                                                                                                       |
| At2g30970              | S074F10 | ASP1 (aspartate aminotransferase 1)                                                                                                                                                |
| At5g47720              | S077F08 | acetyl-CoA C-acyltransferase, putative / 3-ketoacyl-CoA thiolase, putative                                                                                                         |
| At1g72150              | S084A10 | PATL1 (PATELLIN 1); transporter                                                                                                                                                    |
| At1g30380              | S089A11 | PSAK (photosystem i subunit K)                                                                                                                                                     |
| At1g44542              | S092C04 | cyclase family protein                                                                                                                                                             |
| At5g20180              | S093F10 | ribosomal protein L36 family protein                                                                                                                                               |
| At4g07390              | S094B12 | PQ-loop repeat family protein / transmembrane family protein                                                                                                                       |
| At1g79340              | S095F07 | latex-abundant protein, putative (AMC7) / caspase family protein                                                                                                                   |
| At2g05990              | S098E05 | ENR1, MOD1 (mosaic death 1); enoyl-[acyl-carrier-protein] reductase (NADH)/ oxidoreductase                                                                                         |
| At3g12260              | S102A12 | complex 1 family protein / LVR family protein                                                                                                                                      |

|           |         |                                                                                                      |
|-----------|---------|------------------------------------------------------------------------------------------------------|
| At4g01050 | S103D02 | hydroxyproline-rich glycoprotein family protein                                                      |
| At5g21105 | S105A09 | L-ascorbate oxidase/ copper ion binding                                                              |
| At5g10290 | S109C05 | leucine-rich repeat family protein / protein kinase family protein                                   |
| At4g03280 | S109G09 | PGR1, PETC (photosynthetic electron transfer C)                                                      |
| At2g25530 | S114B12 | AFG1-like ATPase family protein                                                                      |
| At2g13360 | S114H07 | AGT1, AGT (alanine:glyoxylate aminotransferase)                                                      |
| At4g39980 | S119F03 | DHS1 (3-deoxy-d-arabino-heptulosonate 7-phosphate synthase 1); 3-deoxy-7-phosphoheptulonate synthase |
| At2g40540 | S121F01 | ATKT2, SHY3, KUP2, ATKUP2, TRK2, KT2 (potassium transporter 2); potassium ion transporter            |
| At2g17880 | S122C03 | DNAJ heat shock protein, putative                                                                    |
| At3g27820 | S122E12 | ATMDAR4 (monodehydroascorbate reductase 4); monodehydroascorbate reductase (NADH)                    |
| At4g16360 | S124F09 | 5'-AMP-activated protein kinase beta-2 subunit, putative                                             |
| At3g22660 | S129B05 | rRNA processing protein-related                                                                      |
| At5g47840 | S130D09 | adenylate kinase, chloroplast, putative / ATP-AMP transphosphorylase, putative                       |
| At5g57900 | S130H05 | SKIP1 (SKP1 interacting partner 1)                                                                   |
| At1g11840 | S132D06 | ATGLX1 (glyoxalase I homolog); lactoylglutathione lyase                                              |

- 
- a. Genes up-regulated in stigma relative to ovary (cDNA subtraction, 32 top genes) (Table 1 from Swanson et al., 2005).
